# Supplementary material for: Depression, Anxiety and Stress among the Caregivers of Clubfoot Patients
Source: Research Square preprint supplement (doi:10.21203/rs.3.rs-7352666/v1), 2025-08-14
Supplement: Supplementary file 1 [file 480a2565a2c43bafff77c615.docx]

| **Variables** | **Category** | **Frequency** | **Percentage (%)** |
| --- | --- | --- | --- |
| Age of Caregiver | 18-22 years | 17 | 20.0 |
| 23 -25 years | 19 | 22.4 |
| 26 -30 years | 23 | 27.1 |
| > 30 year | 26 | 30.6 |
| Age of caregivers overall (Mean ±SD) = (2.68 ±1.115) | | | |
| Age of Children | 1-4 month | 19 | 22.4 |
| 5-11 month | 21 | 24.7 |
| 12-23 month | 15 | 17.6 |
| >23 month | 30 | 35.3 |
| Age of Children overall (Mean ±SD) = (2.66 ±1.181.) | | | |
| Educational status of caregiver | Non formal | 1 | 1.2 |
| Primary | 27 | 31.8 |
| Secondary | 29 | 34.1 |
| Bachelor of degree | 28 | 32.9 |
| Educational status of caregiver overall (Mean ±SD) = (1.99 ±0.838) | | | |
| Occupation of  caregiver | Homemaker | 81 | 95.3 |
| Others | 4 | 4.7 |
| Occupation of caregiver overall (Mean ±SD) = (1.09 ±0.426) | | | |
| Monthly family income | 10000-15000 | 6 | 7.1 |
| 16000-30000 | 34 | 40 |
| 31000-40000 | 11 | 12.9 |
| >40000 | 34 | 40 |
| Monthly family income overall (Mean ±SD) = (2.86 ±1.04) | | | |

***Table 1: Demographic data***

| **Variables** | **Category** | **Frequency** | **Percentage (%)** |
| --- | --- | --- | --- |
| Depression level of the caregivers  (n = 38) | Mild | 11 | 28.9 |
| Moderate | 11 | 28.9 |
| Severe | 6 | 15.8 |
| Extreme severe | 10 | 26.32 |
| Anxiety level of the caregivers  (n = 43) | Mild | 1 | 2.33 |
| Moderate | 16 | 37.21 |
| Severe | 5 | 11.63 |
| Extreme severe | 21 | 48.84 |
| Stress level of the caregivers  (n = 24) | Mild | 5 | 20.8 |
| Moderate | 3 | 12.5 |
| Severe | 11 | 45.83 |
| Extreme severe | 5 | 20.8 |

***Table 2: Level of Depression, Anxiety and stress***

| **Dependent Variable** | **Significant Independent Variable** | **Value** | **p-Value** |
| --- | --- | --- | --- |
| **Depression** | Education of caregiver | 22.807 | 0.029** |
| **Anxiety** | Monthly income | 26.594 | 0.009** |
| **Stress** | Age group of caregiver | 20.818 | 0.053* |
| Birth weight | 31.239 | 0.013** |
| Mode of delivery | 9.231 | 0.056* |

*→ Marginally significant (p < 0.10), ** → Statistically significant (p < 0.05), *** → Highly significant (p < 0.01)

***Table 3: Sstatestical test of Depression, Anxiety and stress***
